# Supplementary material for: Employing Engineered Enolase Promoter for Efficient Expression of Thermomyces lanuginosus Lipase in Yarrowia lipolytica via a Self-Excisable Vector
Source: MDPI journal article supplement (doi:10.3390/ijms24010719), 2022-12-31

## Supplementary Materials

# **Employing engineered enolase promoter for efficient expression of *Thermomyces lanuginosus* lipase in *Yarrowia lipolytica* via a self-excisable vector**

Liangcheng Jiao<sup>†</sup>, Wenjuan Li<sup>†</sup>, Yunchong Li, Qinghua Zhou, Mengqin Zhu, Guowei  
Zhao, Houjin Zhang, Yunjun Yan<sup>\*</sup>

Key Laboratory of Molecular Biophysics of the Ministry of Education, College of  
Life Science and Technology, Huazhong University of Science and Technology,  
Wuhan 430074, P. R. China

\* Correspondence: [yanyunjun@hust.edu.cn](mailto:yanyunjun@hust.edu.cn); Tel/Fax: +86-27-87792213;

<sup>†</sup>These authors contributed equally to this work.

## Supplementary Tables

**Table S1.** the extracellular protein concentration of recombinant strains.

| Strains                       | the extracellular protein concentration (g/L) | Annotation                                    |
|-------------------------------|-----------------------------------------------|-----------------------------------------------|
| Polf                          | 0.129 $\pm$ 0.003                             | -                                             |
| Polf/tll                      | 0.307 $\pm$ 0.018                             | -                                             |
| Polf/2tll                     | 0.380 $\pm$ 0.012                             | -                                             |
| Polf/3tll                     | 0.438 $\pm$ 0.025                             | Before fermentation conditions were optimized |
| Polf/4tll                     | 0.422 $\pm$ 0.010                             | -                                             |
| Polf/3tll                     | 0.530 $\pm$ 0.024                             | After optimization of fermentation conditions |
| Polf/3tll-hp4e <sub>100</sub> | 0.523 $\pm$ 0.016                             | -                                             |
| Polf/3tll-hac1                | 0.620 $\pm$ 0.038                             | -                                             |
| Polf/3tll-kar2                | 0.560 $\pm$ 0.020                             | -                                             |
| Polf/3tll-pdi                 | 0.572 $\pm$ 0.024                             | -                                             |
| Polf/3tll-hac1-kar2           | 0.720 $\pm$ 0.027                             | -                                             |
| Polf/3tll-hac1-pdi            | 0.724 $\pm$ 0.016                             | -                                             |
| Polf/3tll-hac1-pdi-kar2       | 0.779 $\pm$ 0.024                             | -                                             |

**Table S2.** Strains and plasmids used in this study.

| Plasmids/strains                                                               | Description                                                                                                                                             | Reference or source |
|--------------------------------------------------------------------------------|---------------------------------------------------------------------------------------------------------------------------------------------------------|---------------------|
| <b>Plasmids</b>                                                                |                                                                                                                                                         |                     |
| hp4d-rml                                                                       | pINA 1296 derivative, harboring <i>rml</i> gene under the control of hp4d promoter                                                                      | [18]                |
| Cre-Y3                                                                         | harboring <i>cre</i> expression cassette under the control of pPOX2 promoter                                                                            | [42]                |
| Cre-axp1                                                                       | harboring <i>rol</i> gene expression cassette                                                                                                           | [42]                |
| T-egfp                                                                         | harboring <i>egfp</i> gene expression cassette                                                                                                          | Our laboratory      |
| Mlu-vgb                                                                        | harboring <i>vgb</i> gene expression cassette                                                                                                           | Our laboratory      |
| pMD19-act1                                                                     | harboring <i>act1</i> gene expression cassette                                                                                                          | Our laboratory      |
| hp4d-egfp                                                                      | hp4d-rml derivative, harboring <i>egfp</i> gene under the control of hp4d promoter                                                                      | This study          |
| hp4d-tll                                                                       | hp4d-rml derivative, harboring <i>tll</i> gene under the control of hp4d promoter                                                                       | This study          |
| pENOn-egfp (n = 75, 100, 125, 150, 175, 200, 300, 400, 700, 1000, and 1300 bp) | hp4d-egfp derivative, harboring <i>egfp</i> gene under the control of different length of enolase promoter                                              | This study          |
| pENOn-tll (n = 100, 125, 200, 400, 700, 1000, and 1300 bp)                     | pENOn-egfp derivative, harboring <i>tll</i> gene under the control of different length of enolase promoter                                              | This study          |
| hp4e <sub>n</sub> -tll (n = 100, 125, 200, 400, 700, 1000, and 1300 bp)        | hp4d-tll derivative, harboring <i>tll</i> gene under the control of different length of enolase hybrid promoter                                         | This study          |
| hp4e <sub>100</sub> -tll (x = 8, 12, 16, 20, 24, 28, and 32)                   | hp4e <sub>100</sub> -tll derivative, harboring <i>tll</i> gene under the control of enolase hybrid promoter containing different copies of UAS1B        | This study          |
| pUAXp7166-hp16e <sub>100</sub> -tll                                            | Cre-Y3 and hp16e <sub>100</sub> -tll derivative, harboring upAxp homologous fragment, a self-excising vector for <i>tll</i> gene markerless integration | This study          |
| pUXpr7166-hp4e <sub>100</sub>                                                  | pUAXp7166-hp16e <sub>100</sub> -tll derivative, harboring upXpr homologous fragment                                                                     | This study          |
| pUXpr7166-hac1                                                                 | pUXpr7166-hp4e <sub>100</sub> derivative, a self-excising vector for <i>hac1</i> gene markerless integration                                            | This study          |
| pUXpr7166-kar2                                                                 | pUXpr7166-hp4e <sub>100</sub> derivative, a self-excising vector for <i>kar2</i> gene markerless integration                                            | This study          |
| pUXpr7166-pdi                                                                  | pUXpr7166-hp4e <sub>100</sub> derivative, a self-excising vector for <i>pdi</i> gene markerless integration                                             | This study          |

## Strains

|                                                                                     |                                                                                                                                                                  |            |
|-------------------------------------------------------------------------------------|------------------------------------------------------------------------------------------------------------------------------------------------------------------|------------|
| Po1f                                                                                | <i>MatA</i> , <i>leu2-270</i> , <i>ura3-302</i> , <i>xpr2-322</i> , <i>axp1-2</i> , <i>Leu<sup>-</sup></i> , <i>Ura<sup>-</sup></i> , $\Delta$ AEF, $\Delta$ AXP | [41]       |
| Po1f/pENOn-egfp (n = 75, 100, 125, 150, 175, 200, 300, 400, 700, 1000, and 1300 bp) | eGFP expressed in Po1f using pENOn-egfp                                                                                                                          | This study |
| Po1f/hp4d-egfp                                                                      | eGFP expressed in Po1f using hp4d-egfp                                                                                                                           | This study |
| Po1f/pENOn-tll (n = 100, 125, 200, 400, 700, 1000, and 1300 bp)                     | TLL expressed in Po1f using pENOn-tll                                                                                                                            | This study |
| Po1f/hp4d-tll                                                                       | TLL expressed in Po1f using hp4d-tll                                                                                                                             | This study |
| Po1f/hp4en-tll (n = 100, 125, 200, 400, 700, 1000, and 1300 bp)                     | TLL expressed in Po1f using hp4en-tll                                                                                                                            | This study |
| Po1f/hpxe100-tll (x = 8, 12, 16, 20, 24, 28, and 32)                                | TLL expressed in Po1f using hpxe100-tll                                                                                                                          | This study |
| Po1f/1tll                                                                           | Po1f derivative, harboring 1 copy of <i>tll</i> expression cassette                                                                                              | This study |
| Po1f/2tll                                                                           | Po1f/1tll derivative, harboring 2 copies of <i>tll</i> expression cassettes                                                                                      | This study |
| Po1f/3tll                                                                           | Po1f/2tll derivative, harboring 3 copies of <i>tll</i> expression cassettes                                                                                      | This study |
| Po1f/4tll                                                                           | Po1f/3tll derivative, harboring 4 copies of <i>tll</i> expression cassettes                                                                                      | This study |
| Po1f/3tll-hp4e100                                                                   | Po1f/3tll derivative, harboring an empty expression cassette                                                                                                     | This study |
| Po1f/3tll-hac1                                                                      | Po1f/3tll harboring <i>hac1</i> gene cassette                                                                                                                    | This study |
| Po1f/3tll-kar2                                                                      | Po1f/3tll harboring <i>kar2</i> gene cassette                                                                                                                    | This study |
| Po1f/3tll-pdi                                                                       | Po1f/3tll harboring <i>pdi</i> gene cassette                                                                                                                     | This study |
| Po1f/3tll-hac1-pdi                                                                  | Po1f/3tll harboring <i>hac1</i> gene cassette and <i>pdi</i> gene cassette                                                                                       | This study |
| Po1f/3tll-hac1-kar2                                                                 | Po1f/3tll harboring <i>hac1</i> gene cassette and <i>kar2</i> gene cassette                                                                                      | This study |
| Po1f/3tll-hac1-pdi-kar2                                                             | Po1f/3tll harboring <i>hac1</i> gene cassette, <i>pdi</i> gene cassette, and <i>kar2</i> gene cassette                                                           | This study |

---

**Table S3.** Primers used in this study.

| Primers                  | Sequence (5'-3')                                                      | Annotation                        |
|--------------------------|-----------------------------------------------------------------------|-----------------------------------|
| egfp-F                   | CCCA <u>AGCTT</u> ATGGTGAGCAAGGGCGAGGAG                               | <i>Hind</i> III site (underlined) |
| egfp-R                   | GGGGT <u>ACCTT</u> ACTTGTACAGCTCGTCC                                  | <i>Kpn</i> I site (underlined)    |
| TLL-F                    | ACCGCCTTTACTATTCTCAC <u>GGCCGTTCTGGCCAT</u><br>GGAGGTCTCCCAGGACCTGTTC | <i>Sfi</i> I site (underlined)    |
| TLL-R                    | CGGCAACGTGGGGACAGGCCATGGAG <u>GTACCTTA</u><br>CAGGCAGGTGCCGATCAGGCCG  | <i>Kpn</i> I site (underlined)    |
| pENO <sub>75</sub> -F1   | GAGCACCGCCGCCGCAAGGAATGGT <u>GGATCCTAA</u><br>AAGGAGCAATCCCCACTAG     | <i>Bam</i> HI site (underlined)   |
| pENO <sub>100</sub> -F1  | GAGCACCGCCGCCGCAAGGAATGGT <u>GGATCCAGC</u><br>GCAATTGGGTTTGCATCATGTA  | <i>Bam</i> HI site (underlined)   |
| pENO <sub>125</sub> -F1  | GAGCACCGCCGCCGCAAGGAATGGT <u>GGATCCGAT</u><br>GACTATTTGGGACCAATCCAA   | <i>Bam</i> HI site (underlined)   |
| pENO <sub>150</sub> -F1  | GAGCACCGCCGCCGCAAGGAATGGT <u>GGATCCTGA</u><br>CGAAAGCACCCCCCTTTGTACA  | <i>Bam</i> HI site (underlined)   |
| pENO <sub>175</sub> -F1  | GAGCACCGCCGCCGCAAGGAATGGT <u>GGATCCCC</u><br>CCAATGGCTTTTAACTTTTCGAA  | <i>Bam</i> HI site (underlined)   |
| pENO <sub>200</sub> -F1  | GAGCACCGCCGCCGCAAGGAATGGT <u>GGATCCAGT</u><br>CCTTCAACAATCCATCTCACC   | <i>Bam</i> HI site (underlined)   |
| pENO <sub>300</sub> -F1  | GAGCACCGCCGCCGCAAGGAATGGT <u>GGATCCGTA</u><br>TTTGAGAGCAAGTTTGGGATT   | <i>Bam</i> HI site (underlined)   |
| pENO <sub>400</sub> -F1  | GAGCACCGCCGCCGCAAGGAATGGT <u>GGATCCTTT</u><br>CACTTGCCAGAACTCTAAGCG   | <i>Bam</i> HI site (underlined)   |
| pENO <sub>700</sub> -F1  | GAGCACCGCCGCCGCAAGGAATGGT <u>GGATCCGTC</u><br>CAGTGCAACCCAGACAGCTGAG  | <i>Bam</i> HI site (underlined)   |
| pENO <sub>1000</sub> -F1 | GAGCACCGCCGCCGCAAGGAATGGT <u>GGATCCCCA</u><br>TGGTGCGTGGAGGCTTTGGCA   | <i>Bam</i> HI site (underlined)   |
| pENO <sub>1300</sub> -F1 | GAGCACCGCCGCCGCAAGGAATGGT <u>GGATCCATC</u><br>TACCTCGGCCCTTGTTTCTTGA  | <i>Bam</i> HI site (underlined)   |

|                          |                                                                           |                                   |
|--------------------------|---------------------------------------------------------------------------|-----------------------------------|
| pENO-R1                  | TCCTCGCCCTTGCTCACCAT <u>AAGCTT</u> GGTGATAAA<br>TGTGTGGTTAGACGGG          | <i>Hind</i> III site (underlined) |
| pENO <sub>100</sub> -F2  | GGA <u>AAGATCT</u> AGCGCAATTGGGTTTGCATCATGTA                              | <i>Bgl</i> II site (underlined)   |
| pENO <sub>125</sub> -F2  | GGA <u>AAGATCT</u> GATGACTATTTGGGACCAATCCAA                               | <i>Bgl</i> II site (underlined)   |
| pENO <sub>200</sub> -F2  | GGA <u>AAGATCT</u> AGTCCTTCAACAATCCATCTCACC                               | <i>Bgl</i> II site (underlined)   |
| pENO <sub>400</sub> -F2  | GGA <u>AAGATCT</u> TTTCACTTGCCAGAACTCTAAGCG                               | <i>Bgl</i> II site (underlined)   |
| pENO <sub>700</sub> -F2  | GGA <u>AAGATCT</u> GTCCAGTGCAACCCAGACAGCTGAG                              | <i>Bgl</i> II site (underlined)   |
| pENO <sub>1000</sub> -F2 | GGA <u>AAGATCT</u> CCATGGTGCGTGGAGGCTTTGGCA                               | <i>Bgl</i> II site (underlined)   |
| pENO <sub>1300</sub> -F2 | GGA <u>AAGATCT</u> ATCTACCTCGGCCCTTGTTCCTTGA                              | <i>Bgl</i> II site (underlined)   |
| dwCre-F                  | GCCTGCTGGAAGATGGCGATTAG                                                   | -                                 |
| lipTT66-R1               | GTGTGAGATACCGTTCGTATAATGTATGCTATACG<br>AAGTTATCTCCACCTGTGTCAATC           | -                                 |
| 66upAxp-F                | CATTATACGAACGGTATCTCACACCCACCTCCAAG                                       | -                                 |
| upAxp-R                  | GGGAGAGCTCTAGAGTCGACACGCGTCG <u>ACTAGT</u><br>CTTTAGAATTGGAAGCTGATC       | <i>Spe</i> I site (underlined)    |
| hp4d-F                   | CTAGTCGACGCGTGTGCGACTCTAGAGCTC                                            | -                                 |
| Xpr2pre-R                | GGCCAGAACGGCCGTGAGAATAGTAAAG                                              | -                                 |
| ROL-F                    | CTATTCTCACGGCCGTTCTGGCCGTGCCTGTGTCT<br>GGCAAGTC                           | -                                 |
| kpnROL-R                 | GAGGT <u>ACCCT</u> ACAGACAGGAGCCCTCGTTG                                   | <i>Kpn</i> I site (underlined)    |
| XprTT-F                  | CAACGAGGGCTCCTGTCTGTAGGGTACCTCCATGG<br>CCTGTCCCCACGTTG                    | -                                 |
| Xprlox71-R               | CACGAGGCCCTTTCTGTCTTCAAGA <u>AATTC</u> GAGACCT<br>CATGTTTGACAGCTTATCATAAC | <i>Eco</i> RI site (underlined)   |
| Yvgb-F                   | CCACA <u>AAGCTT</u> GCCACCATGTTGGATCAACAGAC<br>CATTAAC                    | <i>Hind</i> III site (underlined) |
| Yvgb-R                   | CAACGTGGGGACAGGCCATGGAG <u>GCGGCCG</u> CTTAT<br>TCAACAGCTTGAGCG           | <i>Not</i> I site (underlined)    |
| mLeu-F                   | GA <u>AAGATCT</u> ACTGATCACGGGCAAAAG                                      | <i>Bgl</i> II site (underlined)   |

|                         |                                                                   |                                   |
|-------------------------|-------------------------------------------------------------------|-----------------------------------|
| mLeu-R                  | CATGGTGGC <u>AAGCTT</u> TGTGG                                     | <i>Hind</i> III site (underlined) |
| XprTT-F2                | TCCATGGCCTGTCCCCACGTTG                                            | -                                 |
| Ampup-R                 | GAAGCATTTATCAGGGTTATTG                                            | -                                 |
| lipTT66-R2              | CTGTCTACCGTTCGTATAATGTATGCTATACGAAG<br>TTATCTCCACCTGTGTCAATC      | -                                 |
| 66upXpr-F               | CATTATACGAACGGTAGACAGTTAGAGCAGCAAC<br>GCG                         | -                                 |
| upXpr-R                 | CTCTAGAGTCGACACGCGTCG <u>ACTAGT</u> GGGCCCCGT<br>CGATGGGGTTTATATC | <i>Spe</i> I site (underlined)    |
| pENO <sub>100</sub> -F3 | GGA <u>AAGATCT</u> AGCGCAATTGGGTTTGCATCATGTA                      | <i>Bgl</i> II site (underlined)   |
| pENO <sub>100</sub> -F4 | CGCGGATCCAGCGCAATTGGGTTTGCATCATGTA                                | <i>Bam</i> HI site (underlined)   |
| pENO-R2                 | CATGGTGGC <u>AAGCTT</u> GGTGATAAATGTGTGGTTAG<br>ACG               | <i>Hind</i> III site (underlined) |
| pENO-R3                 | ATTTGCGGCCGCGGTGATAAATGTGTGGTTAGACG                               | <i>Not</i> I site (underlined)    |
| Kar2-F                  | ATCACCA <u>AAGCTT</u> GCCACCATGAAGTTCTCTATGCC<br>TTCGTGGG         | <i>Hind</i> III site (underlined) |
| Kar2-R                  | AAGGAAAAAAGCGGCCGCTTAAAGCTCATCGTGG<br>AAAGGAGCC                   | <i>Not</i> I site (underlined)    |
| Pdi-F                   | ATCACCA <u>AAGCTT</u> GCCACCATGAAGTTCACTGCCCT<br>CACAATTG         | <i>Hind</i> III site (underlined) |
| Pdi-R                   | AAGGAAAAAAGCGGCCGCTTAAAGCTCATCATCA<br>ATCTTGCCT                   | <i>Not</i> I site (underlined)    |
| Hac1-F                  | ATCACCA <u>AAGCTT</u> GCCACCATGTCTATCAAGCGAGA<br>AGAGTCCT         | <i>Hind</i> III site (underlined) |
| Hac1-R                  | AAGGAAAAAAGCGGCCGCTCACTCCAATCCCCCA<br>AACAGGTTG                   | <i>Not</i> I site (underlined)    |
| Axpout-R                | CGACCTGGAGAAGATCTGTG                                              | -                                 |
| qact1-F                 | CTGGCCGAGATCTTACCGAC                                              | RT-PCR for <i>act1</i> gene       |
| qact1-R                 | CATCGGGAAGCTCGTAGGAC                                              | RT-PCR for <i>act1</i> gene       |

|        |                       |                            |
|--------|-----------------------|----------------------------|
| qtll-F | CTGGACAACACCAACAAGCTG | RT-PCR for <i>tll</i> gene |
| qtll-R | GTCCTCAACCTTCTGTCGGAG | RT-PCR for <i>tll</i> gene |

---



## Supplementary Figures

### Figure captions

**Figure S1.** PCR identification of several Polf/tll strains. (A) PCR using primers XprTT-F2 and Axpout-R, CK: Polf (control); (B) PCR using primers TLL-F and TLL-R, CK: pUAxp7166-hp16e<sub>100</sub>-tll (control); H<sub>2</sub>O: water (control).

**Figure S2.** (A) Effect of glycosylation on TLL expressed by *Y. lipolytica*; lane M, molecular weight marker; lane 1, Polf/tll fermentation supernatant; lane 2, deglycosylation of TLL expressed by Polf/tll; lane 3, Endo H; (B) Mass spectrometry results for TLL, partially matched peptides are shown in red.

**Figure S3.** Optimization of TLL fermentation in 500-mL shake flasks. (A) Effects of different D-sorbitol concentrations on TLL production; (B) Relationship between TLL activity and inoculation density; (C) Influences of different initial pH on TLL production; (D) Effects of culture medium volume on TLL expression. (E) Time course of TLL expression.

**Figure S4.** Schematic diagram of recombinant plasmids. (A) hp4d-egfp; (B) pENOn-egfp (n = 75, 100, 125, 150, 175, 200, 300, 400, 700, 1000, and 1300 bp); (C) hp4d-tll; (D) pENOn-tll (n = 100, 125, 200, 400, 700, 1000, and 1300 bp); (E) hp4e<sub>n</sub>-tll (n = 100, 125, 200, 400, 700, 1000, and 1300 bp).

**Figure S5.** Flow diagram of the steps used for construction of expression vectors  $hp4e_{100}$ -tll ( $x = 8, 12, 16, 20, 24, 28, \text{ and } 32$ ) harboring different copies of UAS1B.

**Figure S6.** Schematic diagram of recombinant plasmids. (A) pUAXp7166- $hp16e_{100}$ -tll; (B) pUXpr7166-type plasmids, helper gene means  $hp4e_{100}$  (control), *hac1*, *kar2*, and *pdi*, respectively.

Figure S1

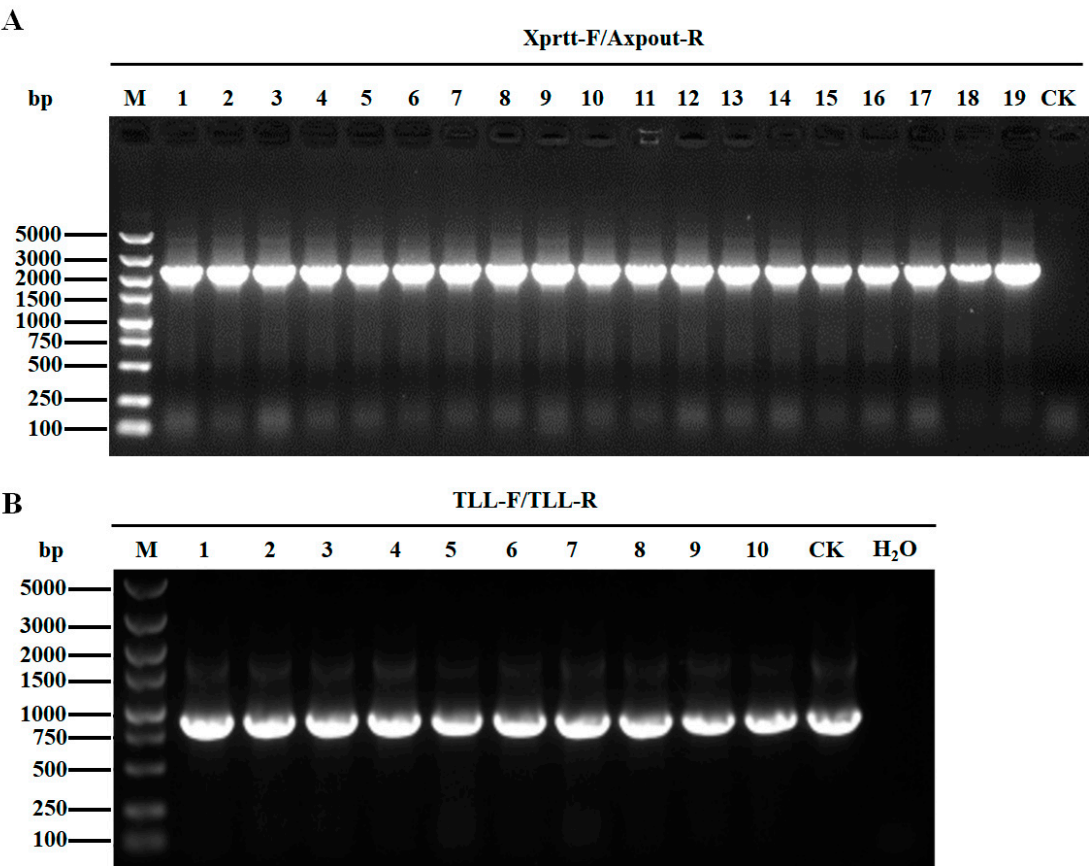

Figure S2

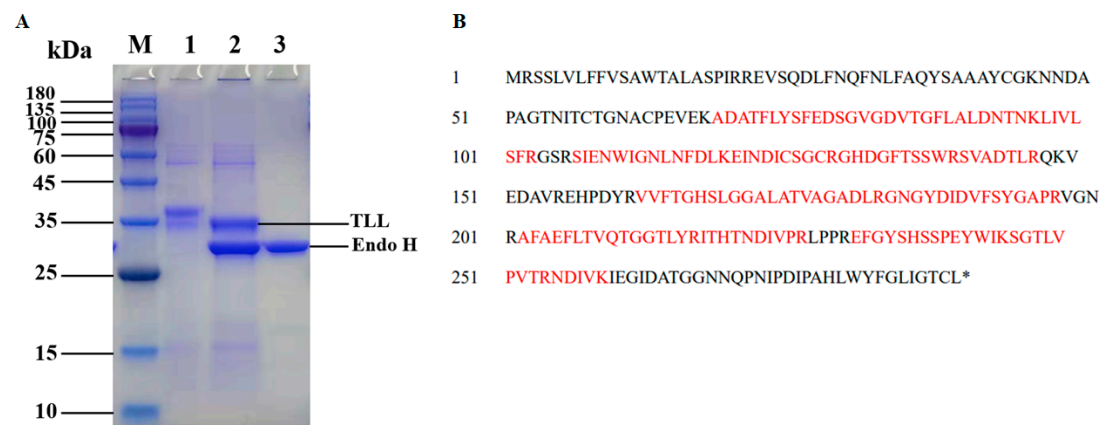

Figure S3

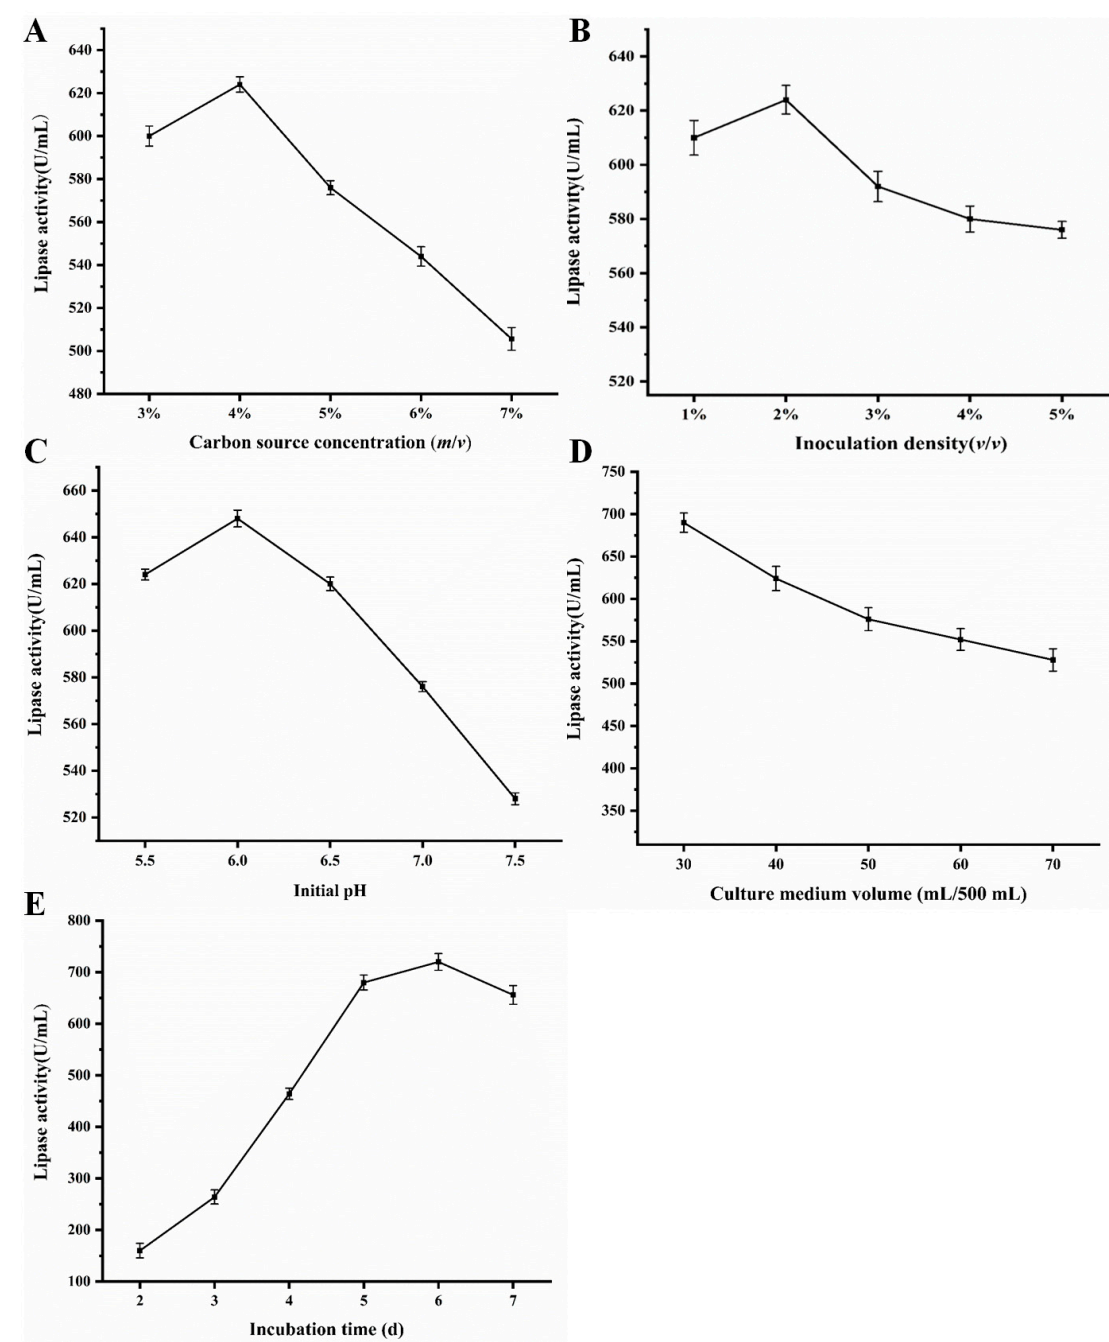

**Figure S4**

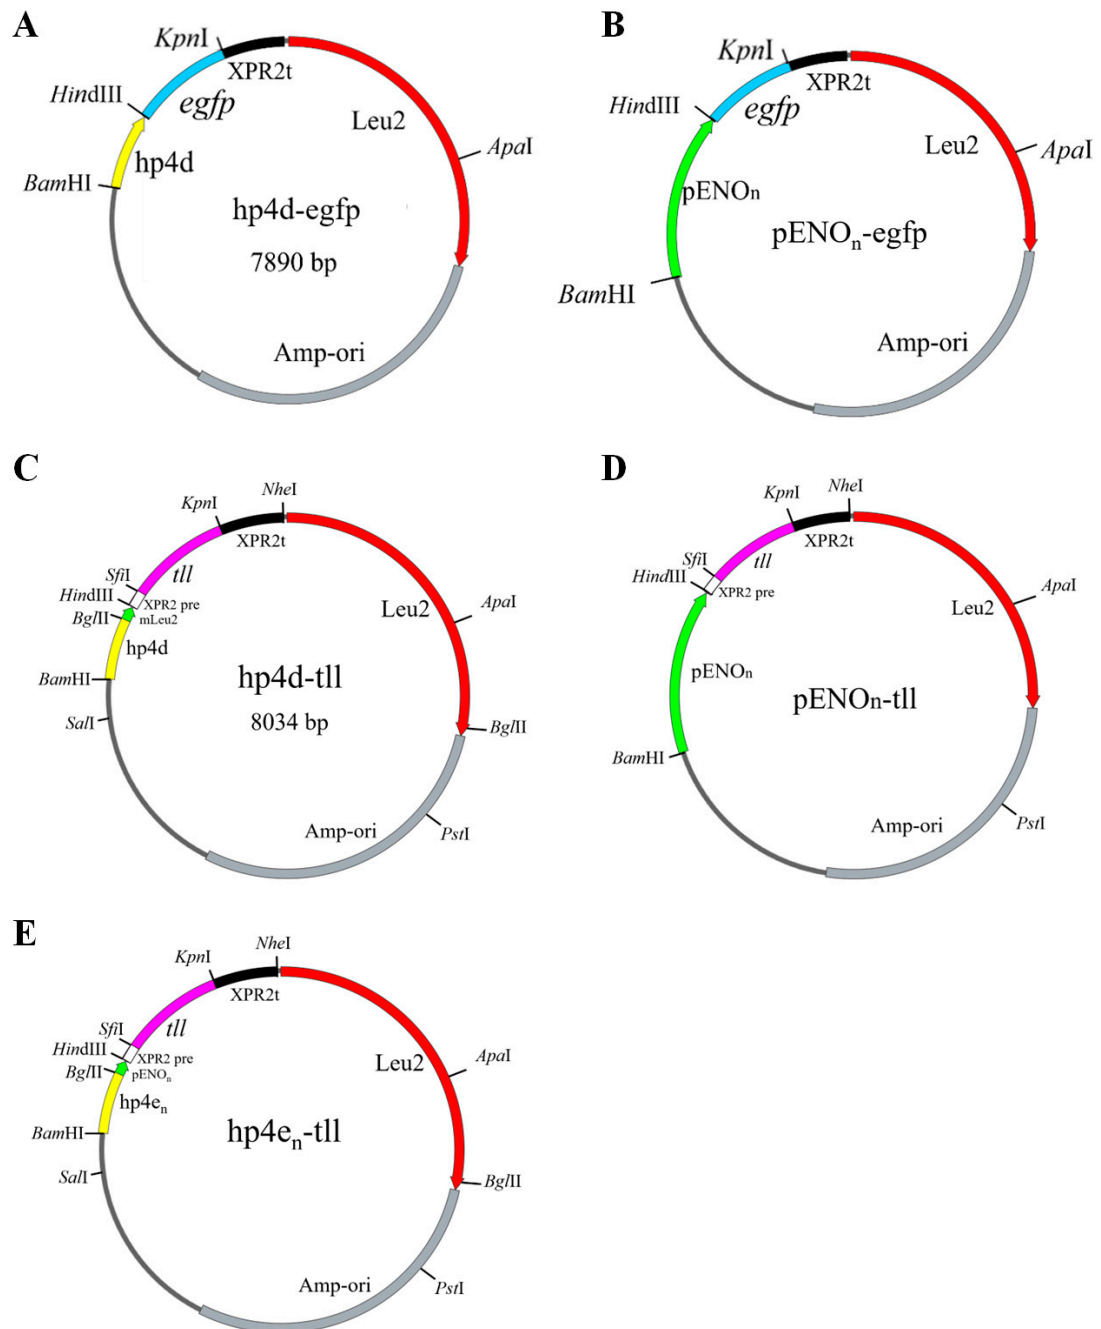

**Figure S5**

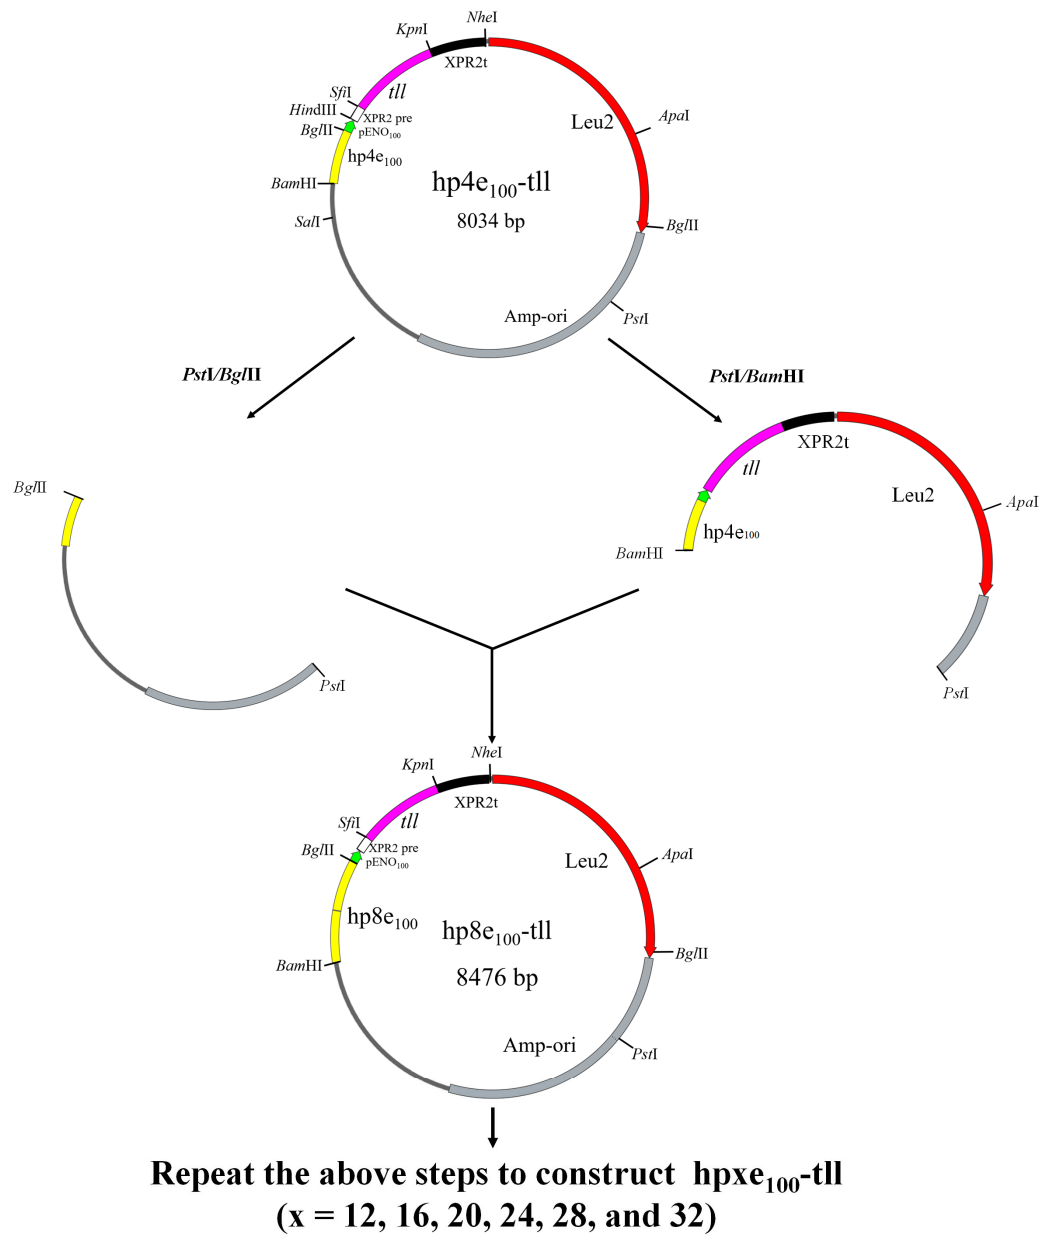

Figure S6

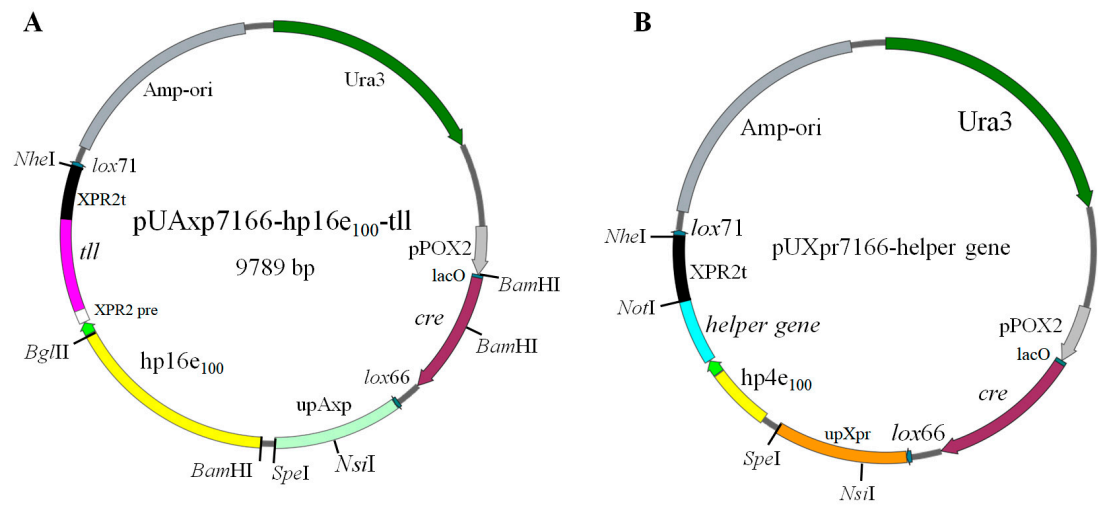

Supplement: s1 [file s1]
